# Supplementary material for: Interface engineering of superhydrophobic octadecanethiol-functionalized hollow mesoporous carbon spheres for alkaline oxygen reduction to hydrogen peroxide
Source: Royal Society of Chemistry journal article supplement (doi:10.1039/d3ta01986a), 2023-01-01
Supplement: d3ta01986a1.pdf [file d3ta01986a1.pdf]

### Electronic Supplementary Information

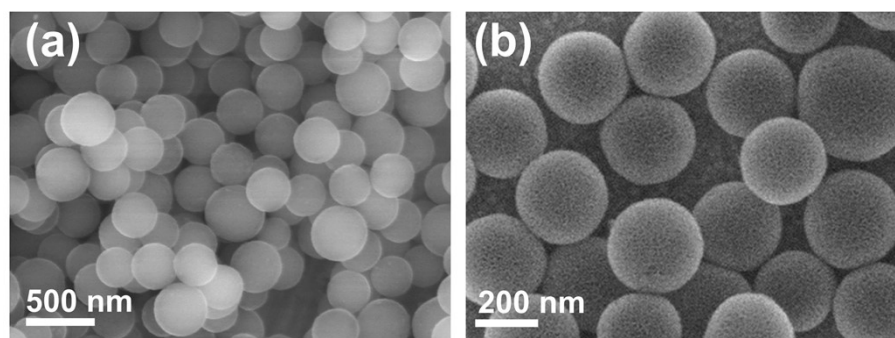

**Fig. S1** SEM images of (a)  $\text{SiO}_2@\text{SiO}_2/\text{RF}$  and (b) HMCSs.

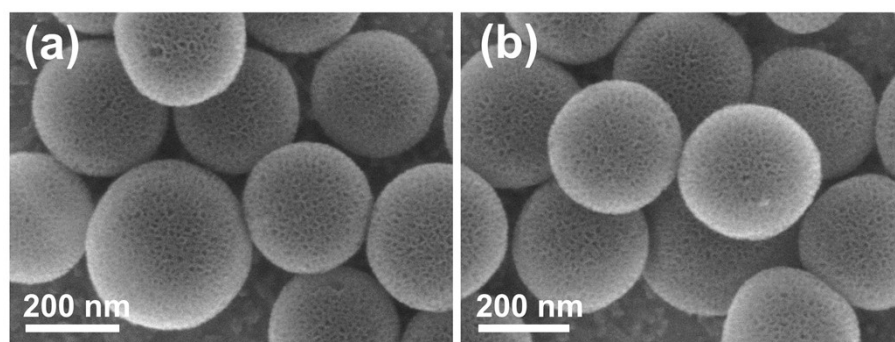

**Fig. S2** SEM images of (a) HMCSs@OT and (b) HMCSs@NT.

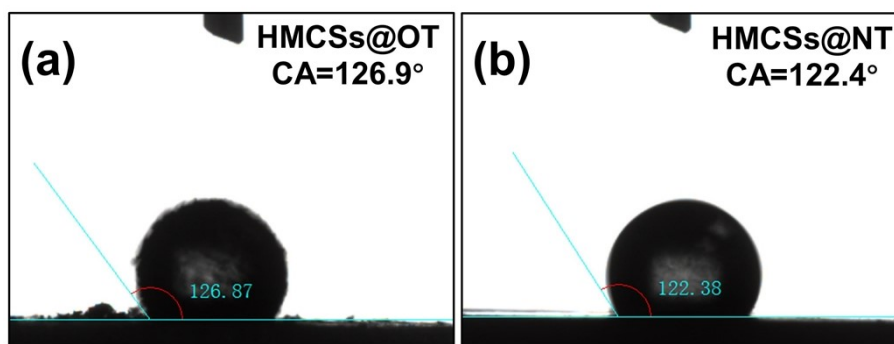

**Fig. S3** Contact angles of (a) HMCSs@OT and (b) HMCSs@NT.

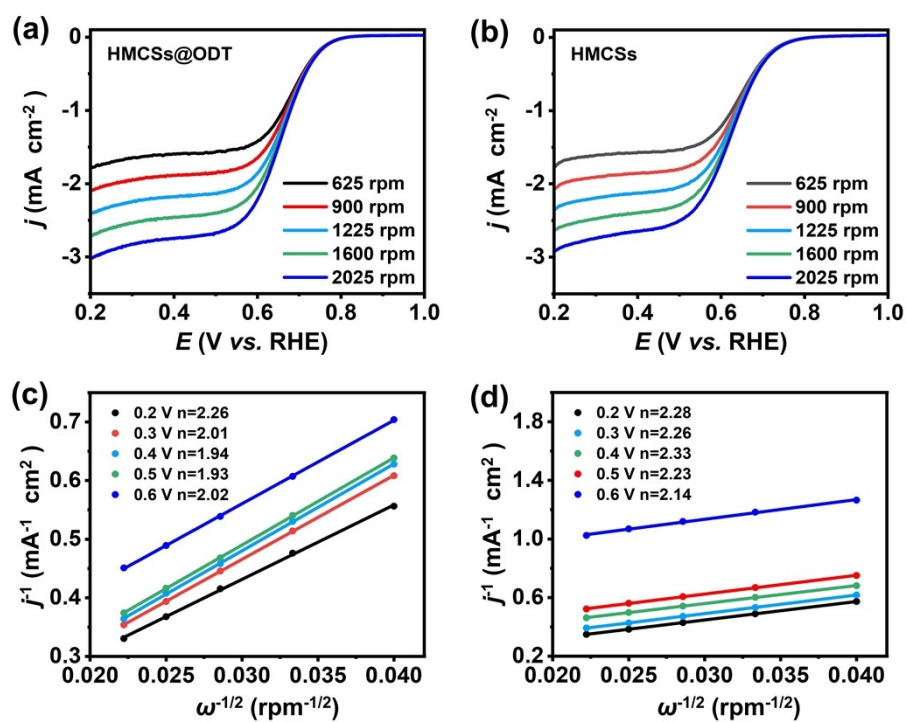

**Fig. S4** ORR polarization curves of (a) HMCSs@ODT and (b)HMCSs at different RDE rotation rates. The electron transfer numbers of (c) HMCSs@ODT and (d)HMCSs at different potentials.

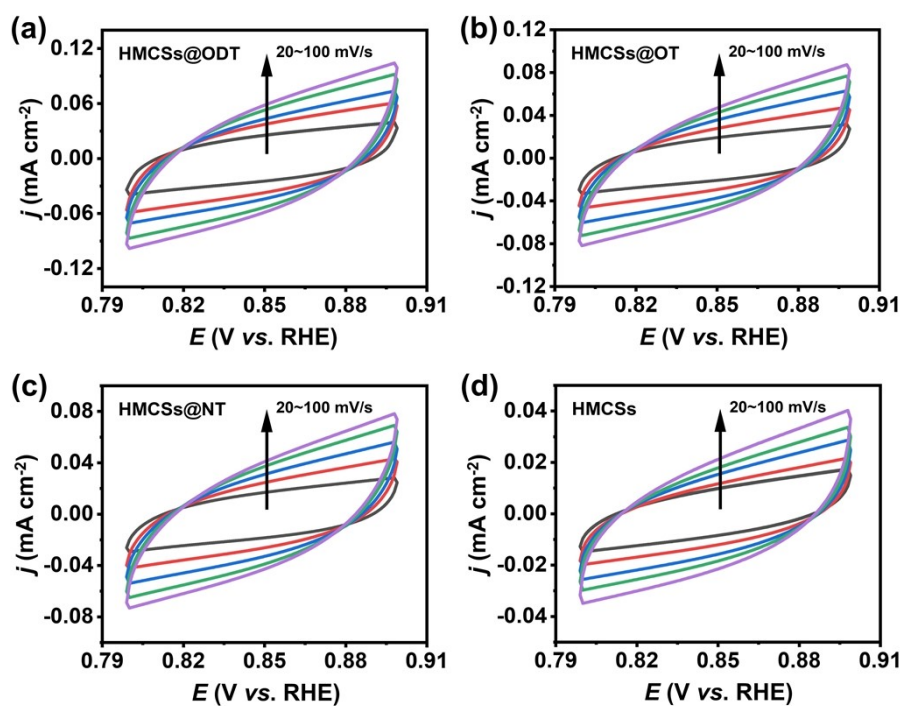

**Fig. S5** (a-d) Cyclic voltammetry curves of various samples measured in the potential range of 0.8–0.9 V vs. RHE with scan rates ranging from 20 to 100 mV s<sup>-1</sup> in the 0.1 M KOH solution.

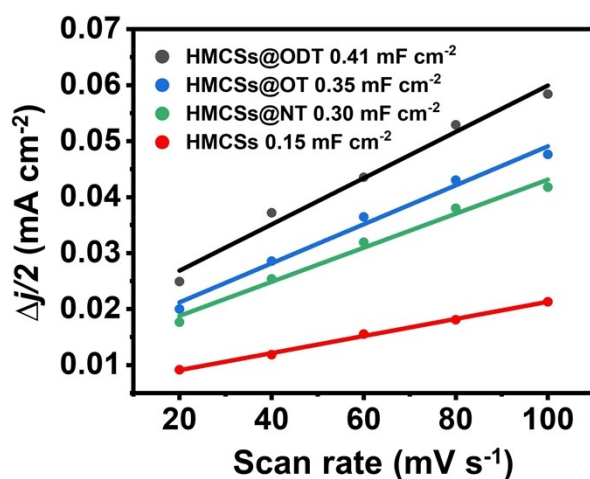

**Fig. S6** The differences in current density variation ( $\Delta j$ ) at an overpotential of 0.85 V plotted against scan rate fitted to a linear regression enabled the estimation of electrochemical double-layer capacitance ( $C_{dl}$ ).

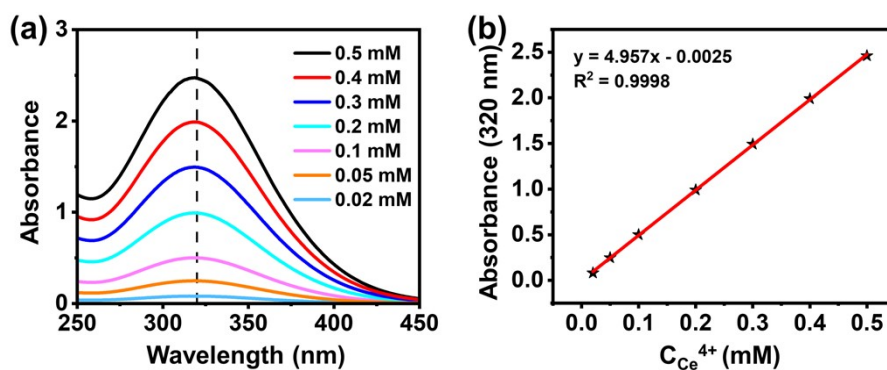

**Fig. S7** (a) UV-vis absorption spectra of  $\text{Ce}^{4+}$  solution with various concentrations and (b) the corresponding standard curve.

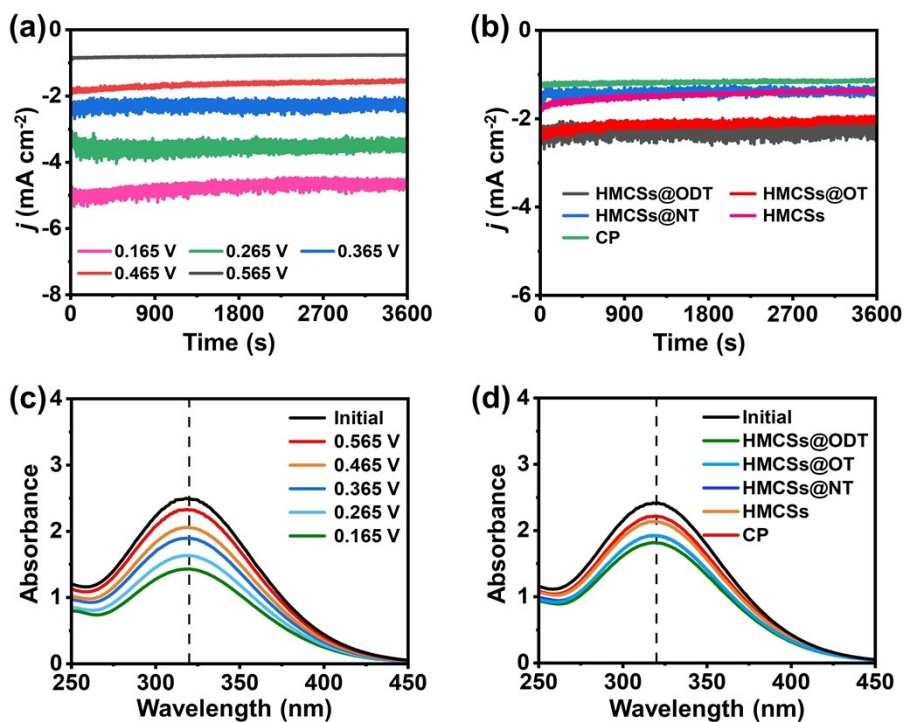

**Fig. S8** (a) Chronoamperometry curves for HMCSs@ODT at various potentials in  $\text{O}_2$ -saturated 0.1 M KOH for 3600 s. (b) Chronoamperometry curves for different samples at  $0.365 \text{ V}_{\text{RHE}}$  in  $\text{O}_2$ -saturated 0.1 M KOH for 3600 s. (c) UV-vis absorption spectra of the electrolytes colored with ceric sulfate indicator at various potentials with HMCSs@ODT. (d) UV-vis absorption spectra of the electrolytes colored with ceric sulfate indicator with different samples at  $0.365 \text{ V}_{\text{RHE}}$ .

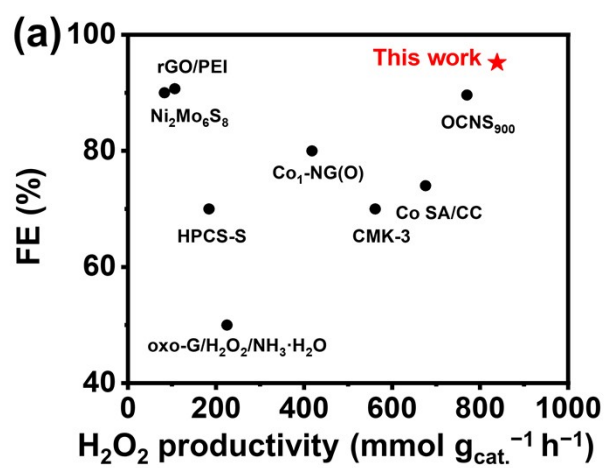

**Fig. S9**  $\text{H}_2\text{O}_2$  productivity and faradaic efficiency of HMCSs@ODT compared to the reported electrocatalysts.

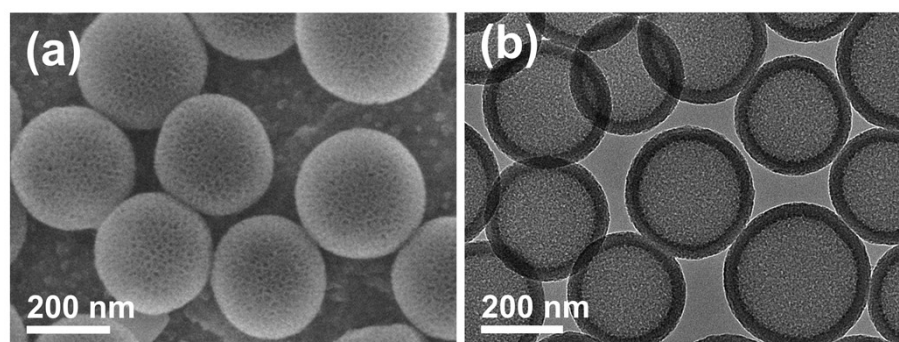

**Fig. S10** (a) SEM and (b) TEM image of the HMCSs@ODT after stability test.

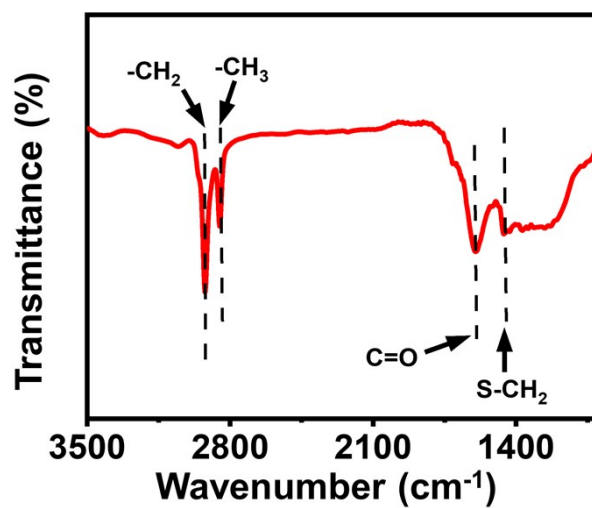

**Fig. S11** FTIR spectrum of HMCSs@ODT after recycling stability test.

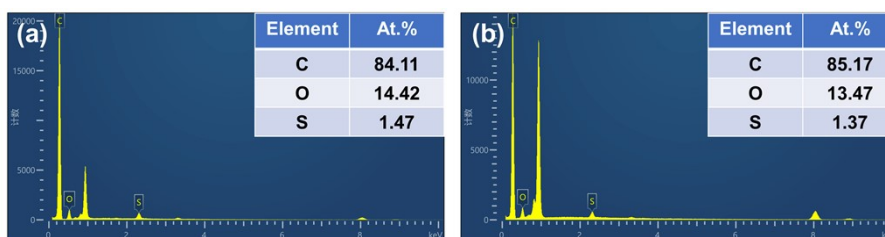

**Fig. S12** EDS spectra of HMCSs@ODT (a) before and (b) after recycling stability test.

**Table S1.** Elemental contents of C, O, and S in HMCSs and HMCSs@ODT.

| Sample   | C (at%) | O (at%) | S (at%) |
|----------|---------|---------|---------|
| HMCS     | 88.3    | 11.7    | —       |
| HMCS@ODT | 91.1    | 7.6     | 1.3     |

**Table S2.** The Comparison between HMCSs@ODT and other reported 2e<sup>-</sup> ORR electrocatalysts for electrosynthesis of hydrogen peroxide.

| Electrocatalyst                                                        | Electrolyte                          | FE (%)      | Productivity                                                   | Ref.             |
|------------------------------------------------------------------------|--------------------------------------|-------------|----------------------------------------------------------------|------------------|
| <b>HMCSs@ODT</b>                                                       | <b>0.1 M KOH</b>                     | <b>95.2</b> | <b>838.8 mmol g<sub>cat.</sub><sup>-1</sup> h<sup>-1</sup></b> | <b>This work</b> |
| oxo-G/H <sub>2</sub> O <sub>2</sub> /NH <sub>3</sub> ·H <sub>2</sub> O | 0.1 M KOH                            | 50          | 224.8 mmol g <sub>cat.</sub> <sup>-1</sup> h <sup>-1</sup>     | 1                |
| Co <sub>1</sub> -NG(O)                                                 | 0.1 M KOH                            | 80          | 418 mmol g <sub>cat.</sub> <sup>-1</sup> h <sup>-1</sup>       | 2                |
| rGO/PEI                                                                | 0.1 M KOH                            | 90.7        | 106.4 mmol g <sub>cat.</sub> <sup>-1</sup> h <sup>-1</sup>     | 3                |
| Ni <sub>2</sub> Mo <sub>6</sub> S <sub>8</sub>                         | 0.1 M KOH                            | >90         | 90 mmol g <sub>cat.</sub> <sup>-1</sup> h <sup>-1</sup>        | 4                |
| HPCS-S                                                                 | 0.1 M KOH                            | 70          | 183.99 mmol g <sub>cat.</sub> <sup>-1</sup> h <sup>-1</sup>    | 5                |
| CMK-3                                                                  | 0.1 M KOH                            | 70          | 561.7 mmol g <sub>cat.</sub> <sup>-1</sup> h <sup>-1</sup>     | 6                |
| OCNS <sub>900</sub>                                                    | 0.1 M KOH                            | 89.6        | 770 mmol g <sub>cat.</sub> <sup>-1</sup> h <sup>-1</sup>       | 7                |
| Co SA/CC                                                               | 0.5 M H <sub>2</sub> SO <sub>4</sub> | 74          | 676 mmol g <sub>cat.</sub> <sup>-1</sup> h <sup>-1</sup>       | 8                |

## References

1. L. Han, Y. Y. Sun, S. Li, C. Cheng, C. E. Halbig, P. Feicht, J. L. Hubner, P. Strasser and S. Eigler, *ACS Catal.*, 2019, **9**, 1283-1288.
2. E. Jung, H. Shin, B. H. Lee, V. Efremov, S. Lee, H. S. Lee, J. Kim, W. Hooch Antink, S. Park, K. S. Lee, S. P. Cho, J. S. Yoo, Y. E. Sung and T. Hyeon, *Nat. Mater.*, 2020, **19**, 436-442.
3. X. Xiao, T. Wang, J. Bai, F. Li, T. Ma and Y. Chen, *ACS Appl. Mater. Interfaces*, 2018, **10**, 42534-42541.
4. F. Xia, B. M. Li, Y. Q. Liu, Y. Z. Liu, S. Y. Gao, K. Lu, J. Kaelin, R. Y. Wang, T. J. Marks and Y. W. Cheng, *Adv. Funct. Mater.*, 2021, **31**, 2104716.
5. G. Y. Chen, J. W. Liu, Q. Q. Li, P. F. Guan, X. F. Yu, L. S. Xing, J. Zhang and R. C. Che, *Nano Res.*, 2019, **12**, 2614-2622.
6. Y. Sun, I. Sinev, W. Ju, A. Bergmann, S. Dresp, S. Köhl, C. Spöri, H. Schmies, H. Wang, D. Bernsmeier, B. Paul, R. Schmack, R. Kraehnert, B. Roldan Cuenya and P. Strasser, *ACS Catal.*, 2018, **8**, 2844-2856.
7. S. Chen, T. Luo, K. Chen, Y. Lin, J. Fu, K. Liu, C. Cai, Q. Wang, H. Li, X. Li, J. Hu, H. Li, M. Zhu and M. Liu, *Angew. Chem., Int. Ed.*, 2021, **60**, 16607-16614.
8. J. C. Zhang, H. B. Yang, J. J. Gao, S. B. Xi, W. Z. Cai, J. M. Zhang, P. Cui and B. Liu, *Carbon Energy*, 2020, **2**, 276-282.
